# Supplementary material for: Granzyme B PET Imaging as a Predictive Biomarker of Immunotherapy Response
Source: Oxford University Press journal article supplement (doi:10.1158/0008-5472.can-16-3346), 2017-04-30
Supplement: 00085472can163346-sup-175838_2_supp_3896367_mmh7t0.docx [file 00085472can163346-sup-175838_2_supp_3896367_mmh7t0.docx]

Supplementary Materials:

Supplemental Figure S1


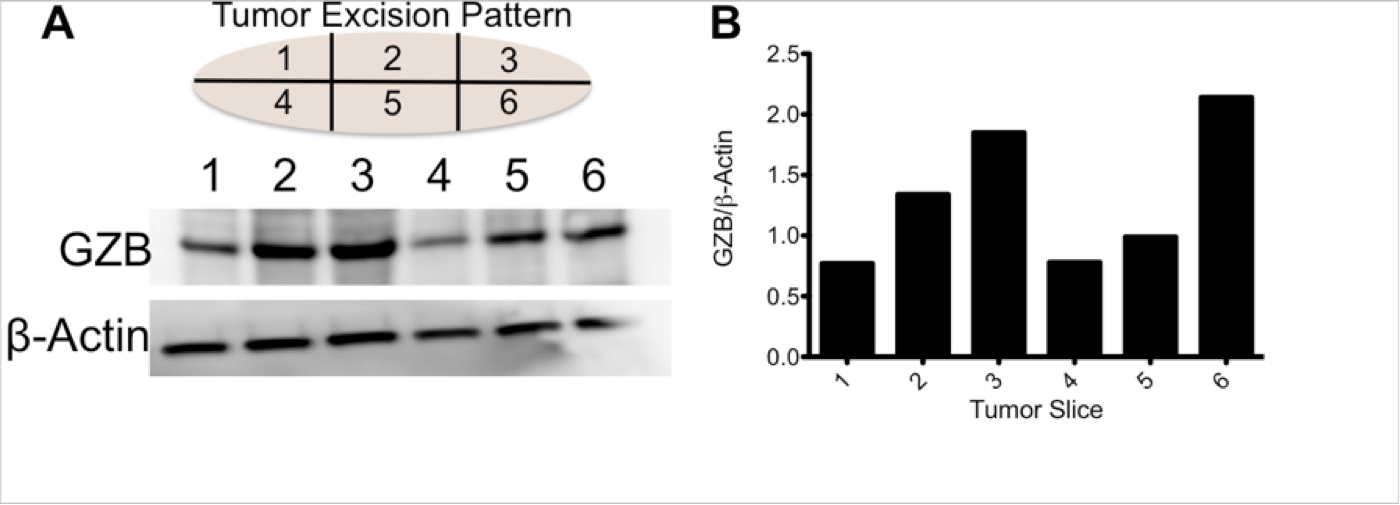


A) Tumor excision and corresponding Western blot quantification of granzyme B (GZB) and β-actin for each of the 6 equal tumor portions. B) Bar graph of the GZB/β-actin ratios for each of the tumor sections demonstrates a 3-fold variation in GZB between tumor regions.

Supplemental Figure S2


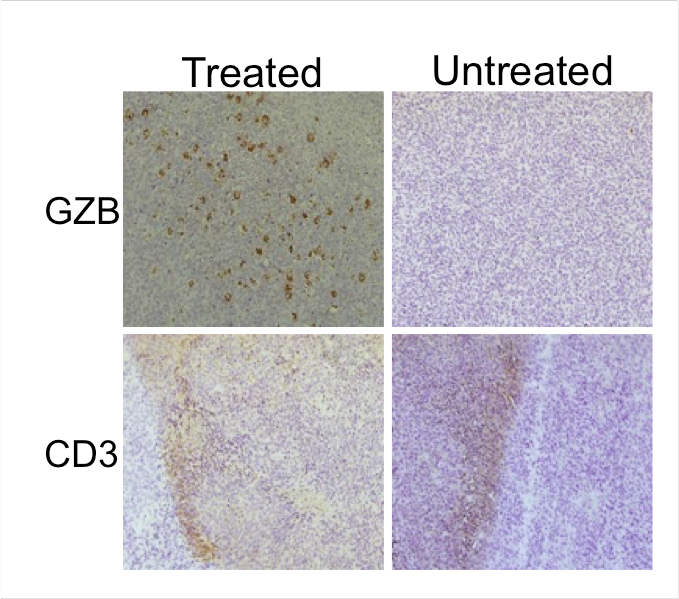


Immunohistochemical staining of granzyme B (GZB) or CD3 in treated and untreated murine CT26 tumor samples. Intense brown staining is seen in only treated tumor samples for GZB, whereas similar staining is seen for CD3 for both treated and untreated samples.

Supplemental Figure S3


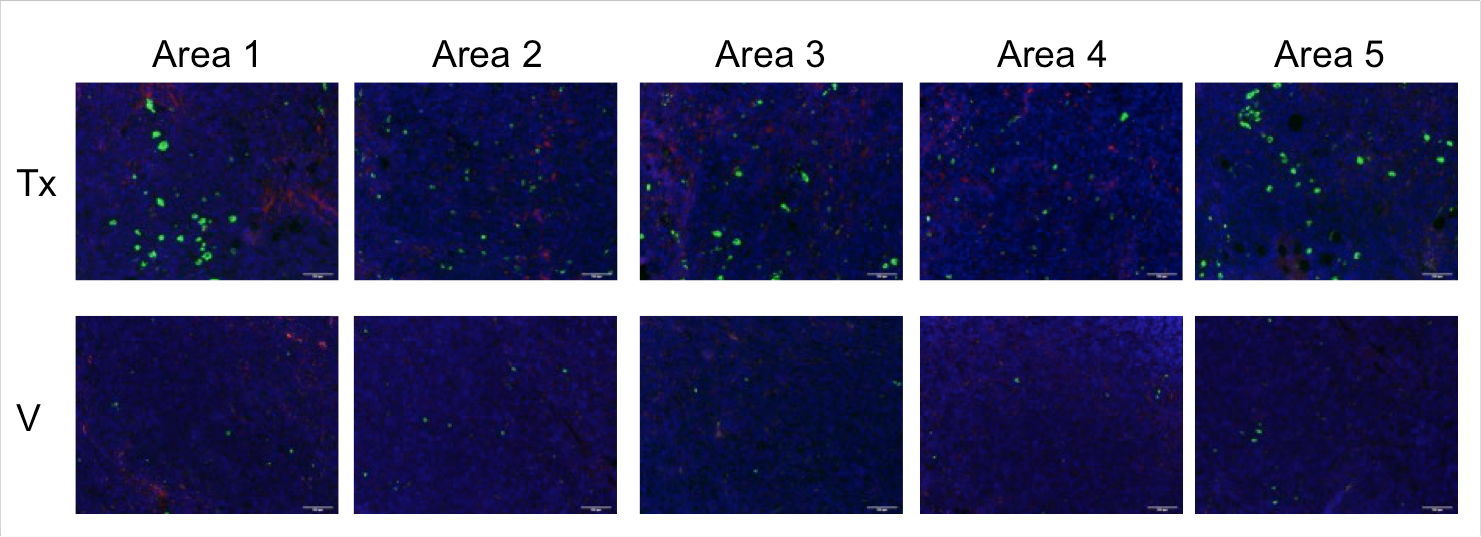


Individual tumors analyzed by granzyme B (green), CD3 (red) and DAPI (blue) immunofluorescent staining. Separate tumor sections from combination treated (Tx) and vehicle treated (V) tumors were analyzed for fluorescent intensity and total fluorescent signal quantified.

Supplemental Figure S4


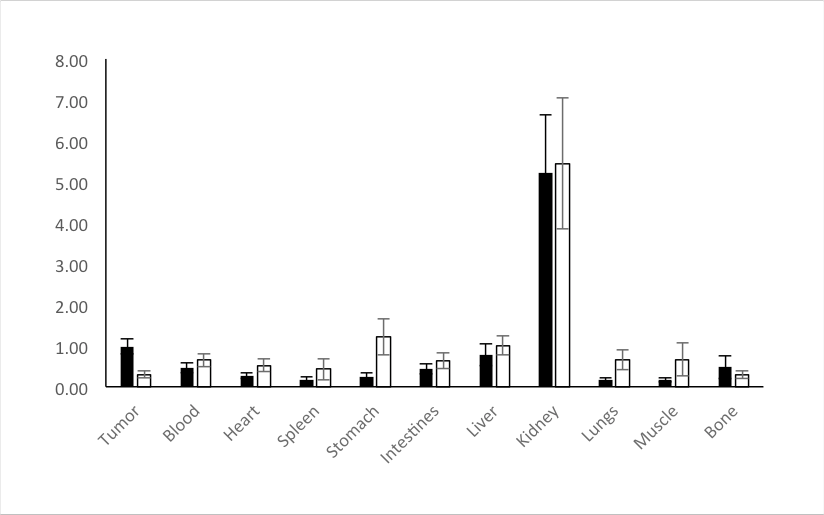


Biodistribution analysis of 68Ga-NOTA-GZP accumulation in selected organs. Day 14 immunotherapy treated (black bars) and vehicle treated (white bars) mice were sacrificed 2 h post-injection and tissues excised, weighed and radioactivity quantified by gamma counter. Bars represent the mean of 6 animals ± SEM.

Supplementary Figure S5


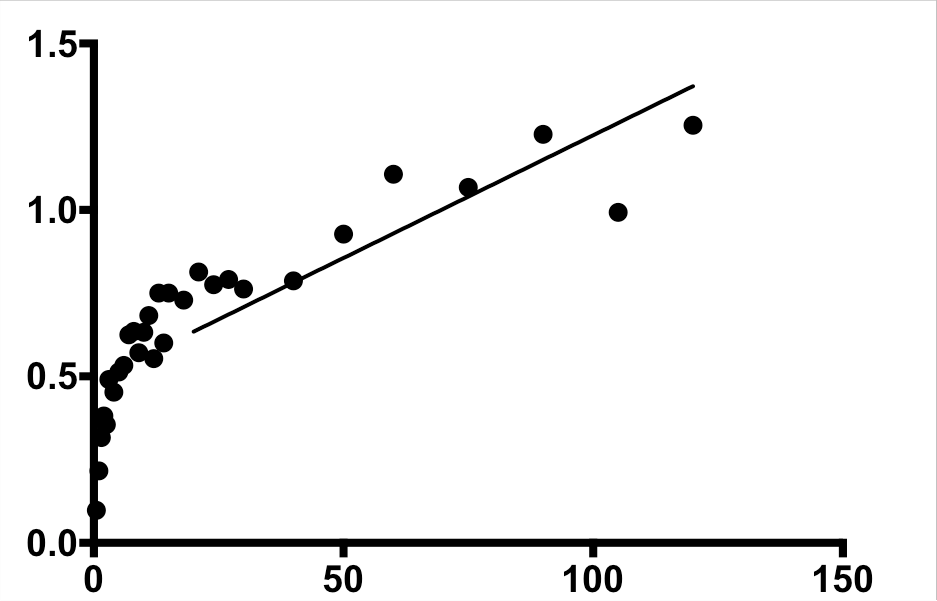


Patlak Analysis of a CT26 tumor-bearing mouse treated with anti-PD-1 and anti-CTLA-4 therapy. Dynamic PET acquisition was acquired over two hours and blood and tumor specific radiotracer accumulation measured. The X and Y-axis are calculated as described previously, and the net tracer influx is measured using a linear regression (P<0.0001).

Supplementary Figure S6


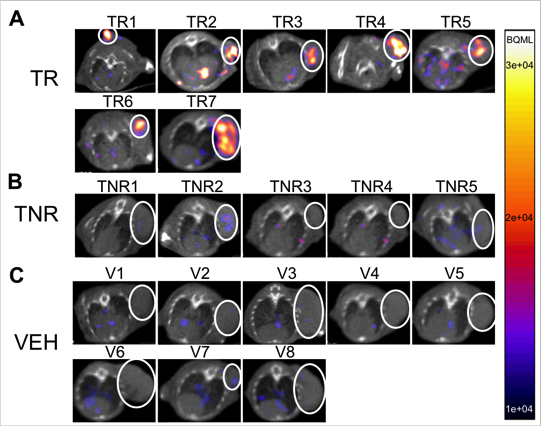


Axial images of all mice utilized for treated tumor response prediction. A white circle is drawn around each tumor to identify area of analysis. Images were acquired on day 12. All PET images scaled as per color bar on right.

Supplemental Video

Videos of rotating maximal intensity projections of combination and vehicle treated mice giving a view of tumor, liver and bladder accumulation in a treated mouse in comparison to only kidney and bladder uptake of the untreated mouse.
